# Supplementary material
Source: HighWire-hosted journal article supplement (https://cmajopen.ca/highwire/filestream/81096/field_highwire_adjunct_files/2/2017-0161_original_submission.pdf)
Supplement: 2017-0161_original_submission.pdf [file 2017-0161_original_submission.pdf]

# Cancer drug expenditure in British Columbia and Saskatchewan: a trend analysis

Reka Pataky, MSc<sup>1,2</sup>; David A. Tran, MA<sup>3</sup>; Andrea Coronado, MSc<sup>4</sup>; Riaz Alvi, MSc<sup>3</sup>; Darryl Boehm, BSP<sup>3</sup>;

Dean A. Regier, PhD<sup>1,2</sup>; Stuart Peacock, DPhil<sup>1,5</sup>

1. Canadian Centre for Applied Research in Cancer Control, BC Cancer, Vancouver BC
2. School of Population and Public Health, University of British Columbia, Vancouver BC
3. Saskatchewan Cancer Agency, Saskatoon SK and Regina SK
4. Canadian Partnership Against Cancer, Toronto ON
5. Faculty of Health Sciences, Simon Fraser University, Burnaby BC

Word count: 2467/2500

Acknowledgements: The Canadian Centre for Applied Research in Cancer Control is funded by the Canadian Cancer Society Research Institute grant 2015-703549. All inferences, opinions, and conclusions drawn in this article are those of the authors, and do not reflect the opinions or policies of the Data Steward(s).

## Abstract

Background: Expenditure on systemic therapy for cancer has been rising quickly, due to growing population, increased utilization, both in the number of users and prescription volume, and rising drug prices. Our objective was to describe trends in expenditure in British Columbia (BC) and Saskatchewan's cancer care systems, and to understand these drivers of growth.

Methods: Pharmacy dispensing records were obtained from the BC Cancer and Saskatchewan Cancer Agency pharmacies, for all anti-cancer therapies dispensed in 2006-2013. Total annual expenditure was calculated directly from the data. A trend analysis of crude and standardized annual expenditure was conducted using generalized linear models. Trends in the following components of total expenditure were estimated: cancer incidence, number of systemic therapy users per incident case, number of dispensed prescriptions per user, and cost per prescription. Analysis was stratified by patient age group, cancer site, and route of administration (oral or intravenous/other).

Results: Expenditures on systemic therapies, adjusted for population growth and ageing, increased an average of 9.2% (95% CI: 7.2, 11.2) in Saskatchewan and 6.4% (95% CI: 5.3, 7.6) in BC. Growth in expenditures on oral agents was more than two times higher than growth in intravenous/other agents. Growth rates varied significantly by cancer site. In both provinces, rising cost per prescription was the largest contributor to overall growth.

Interpretation: Price is the primary driver of growth in systemic therapy expenditure in both BC and Saskatchewan. Understanding the mechanisms of expenditure growth may inform system planning and support policy-makers' efforts to manage rising costs.

Abstract word count: 249

## Introduction

Health care system expenditure on cancer drugs has been rising rapidly. Many factors contribute to this growth: the cost of new cancer therapies has increased(1, 2), systemic therapy is being used in more patients(3-5), and the pool of prevalent cancer cases has been growing due to increasing incidence(6) and improvements in survival(7). The number of new drugs being approved has accelerated alongside higher daily drug costs and longer duration of treatment(8). The use of orally-administered drugs in an outpatient setting has also been a significant change. Unlike conventional intravenous cytotoxic chemotherapy, with high-dose infusions on intermittent schedules, many oral agents are delivered at a lower daily dose over a prolonged period of time(9). With so many contributing factors, there is a strong need for health care systems to disentangle the sources of growth in cancer drug expenditures.

In Canada, understanding these trends is complicated by differences in public funding and delivery models for cancer therapy across provinces. Information on trends in systemic therapy expenditure, trends in the underlying cost drivers, and differences between provinces is not readily available to Canadian policy makers. Even among provinces with similar funding structures for systemic therapy there is variation in coverage for specific drugs, and post-coverage variation in utilization and access(10). Both British Columbia (BC) and Saskatchewan have complete and universal coverage for anti-cancer systemic therapy(11-13). The provinces share strong concordance between formularies, but also report wide variation in utilization rates for many drugs, due in part to differences in policy and uptake(10). Our study was conducted in parallel in BC and Saskatchewan to better understand variation between provinces, while minimizing differences due to funding structure. The objectives of the study are to describe trends in systemic therapy use and cost in BC and Saskatchewan from 2006 to 2013, by therapy

1  
2  
3 type and cancer site, and to identify key drivers of overall growth by isolating trends in demographics,  
4  
5 incidence, utilization and cost.  
6  
7  
8  
9

## 10 **Methods**

### 11 **Data Sources**

12  
13 We conducted secondary analysis of routinely-collected administrative data from the Saskatchewan  
14  
15 Cancer Agency and BC Cancer Agency. In this context secondary analysis refers to analysis of data that  
16  
17 were not collected for research purposes. Both the Saskatchewan Cancer Agency and BC Cancer Agency  
18  
19 provide population-based cancer care services, including complete and universal coverage of systemic  
20  
21 therapy provided according to agency guidelines(12, 13). Data were obtained from the BC Cancer  
22  
23 Systemic Therapy Program and Saskatchewan Cancer Agency Pharmacy System for all prescriptions  
24  
25 dispensed in 2006-2013. These databases contain dispensing records for all systemic therapy delivered  
26  
27 to cancer patients in the province and are routinely reviewed by pharmacy staff for accuracy and quality  
28  
29 assurance. Records for clinical trials, special access programs, and free supplies were excluded, as were  
30  
31 drugs dispensed to pediatric patients or patients with benign disease. Supportive care drugs (e.g., anti-  
32  
33 emetics) were excluded from the analysis using each province's respective classification. Drug ingredient  
34  
35 cost was available directly from the data and adjusted to 2013 Canadian dollars(14). Drugs were  
36  
37 classified by route of administration as oral or intravenous (IV)/other. We generated a preliminary list of  
38  
39 orally-administered drugs in Saskatchewan, and additional drugs appearing in the BC data were added  
40  
41 following review (Appendix 1).  
42  
43  
44  
45  
46  
47  
48  
49  
50  
51  
52

53 Dispensing records were linked with patient-level data from the BC Cancer Registry(15) and the  
54  
55 Saskatchewan Cancer Registry(16) using unique patient identifiers. Patient characteristics obtained from  
56  
57

registry data included age at dispensing date, sex, and primary cancer site(6). For patients diagnosed with multiple primary cancers, the last diagnosis before their first prescription in the observation period was used. Primary cancer site was intended as a proxy for the indication of therapy, because indication was not available from the data. Aggregate cancer incidence, by age, sex and cancer site for 2006-2013 was also obtained from the BC and Saskatchewan Cancer Registries.

## Population effects

Total annual expenditure, prescription volume, and number of unique systemic therapy users was calculated in each province. Adjusted totals were calculated using the 2006 provincial population from Statistics Canada(17) as the reference population. Annual mean per capita expenditure by age was re-weighted to the reference population size and age distribution(18), to adjust for population growth and ageing in each province.

## Components of growth

To investigate the trends underlying overall growth, total expenditure was separated into independent components using the following identity, adapted from McGrail *et al.*(19):

$$\frac{\text{expenditure}}{\text{population}} = \frac{\text{incident cases}}{\text{population}} \times \frac{\text{systemic therapy users}}{\text{incident cases}} \times \frac{\text{\# of prescriptions}}{\text{systemic therapy users}} \times \frac{\text{expenditure}}{\text{\# of prescriptions}} \quad (1)$$

Growth in expenditure for the population was separated into four components: from left, growth in population cancer incidence, times growth in the number of systemic therapy recipients per incident case, times growth in the number of prescriptions per user, times growth in the cost per prescription<sup>1</sup>.

Incidence, total number of users, prescription volume and expenditure were direct standardized by age and sex(20), weighted to the pooled population of BC and Saskatchewan for 2013 using census

<sup>1</sup> For example, 10% growth in expenditure for the population could be made up of 2.5% growth in each of the components as follows:  $1.025 \times 1.025 \times 1.025 \times 1.025 = 1.10$

1  
2  
3 estimates from Statistics Canada(17). Annual percent change in expenditure and in each component of  
4  
5 Equation 1 was estimated using generalized linear models with a log-link and gamma distribution, to  
6  
7 directly estimate the relative growth and to account for the skewed distribution of count and cost data.  
8  
9  
10 Models were stratified by drug route of administration, age group, and cancer site (female breast,  
11  
12 colorectal, lung, prostate, and other)(6). Analysis was done in SAS 9.3 (SAS Institute, Carey NC).  
13  
14  
15

## 16 **Results**

17  
18  
19 From 2006 to 2013, 2.1 million prescriptions for systemic therapy were dispensed in BC and 585,476  
20  
21 prescriptions were dispensed in Saskatchewan (Table 1). In BC, breast cancer was the most common  
22  
23 indication, while in Saskatchewan it was colorectal cancer. Over 30% of dispensed prescriptions in both  
24  
25 provinces had an oral route of administration.  
26  
27  
28

## 29 **Population effects**

30  
31 Crude expenditure increased an average of 11.2% per year (95% CI: 9.3, 13.1) in Saskatchewan and 9.2%  
32  
33 per year (95% CI: 8.0, 10.3) in BC, from approximately \$25M and \$119M in 2006 to \$54M and \$205M in  
34  
35 2013, in Saskatchewan and BC respectively (Supplementary Table S1). Prescription volume and the  
36  
37 number of systemic therapy users also increased over the study period (Figure 1). Growth in  
38  
39 expenditure and prescription volume was higher in Saskatchewan than in BC (Figure 1).  
40  
41  
42

43  
44 In BC, 23% of the increase in expenditure observed from 2006-2013 was attributable to population  
45  
46 growth, and a further 16% was attributable to population ageing. In Saskatchewan, population growth  
47  
48 accounted for 21% of the increase in expenditure, with 2.2% attributable to ageing (Figure 2). After age  
49  
50 and population adjustment, systemic therapy expenditure rose an average of 9.2% (95% CI: 7.2, 11.2)  
51  
52 per year in Saskatchewan and 6.4% (95% CI: 5.3, 7.6) per year in BC.  
53  
54  
55  
56  
57  
58  
59  
60

## Components of growth

The components of age-sex standardized expenditure growth are shown for BC and Saskatchewan in Tables 2 and 3 respectively. Growth in cost per dispensed prescription was the largest component of overall expenditure growth, at 3.2% (95% CI: 2.5, 3.9) per year in BC and 4.7% (95% CI: 3.5, 6.0) per year in Saskatchewan. Both provinces also had increases in the number of systemic therapy users per incident case, and the number of dispensed prescriptions per user. Growth in expenditure for oral agents was higher than for drugs with other routes of administration, at 16.5% per year (95% CI: 13.6, 19.6) and 13.1% per year (95% CI: 10.7, 15.6) in Saskatchewan and BC respectively.

Stratified analysis by cancer site and age group revealed significant variability in trends. In BC, expenditure on oral drugs for breast cancer decreased over the study period (-11.4% per year, 95% CI: -17.8, -4.5), while in Saskatchewan expenditure was unchanged. In both provinces, the greatest increase was seen in oral drugs for prostate cancer: incidence decreased and the number of systemic therapy users and prescriptions increased slightly, while cost per dispensed prescription, grew annually by 20.6% (95% CI: 4.8, 38.7) in BC and 31.6% (95% CI: 12.9, 53.4) in Saskatchewan. Both provinces also showed a trend of increasing expenditure on oral agents in older age groups, but this effect largely disappears after adjusting for both age group and indication (Supplementary Table S2 and S3)

## Interpretation

Average annual growth in expenditure for systemic therapy, at 11.2% in Saskatchewan and 9.2% in BC between 2006 and 2013, outpaced growth in the number of users and prescription volume. After accounting for population growth and ageing, the increase in expenditure on systemic therapy agents remained significant, roughly doubling in Saskatchewan and increasing by half in BC over the study period. In Canada, the average annual growth in wholesale purchases of cancer drugs by hospitals was 15.2% per year between 2004/05 and 2009/10, with the majority of the growth attributed to purchase

1  
2  
3 of newer, high-cost treatments, as opposed to price changes, volume effects, or population growth(2).  
4  
5 Similar patterns have been observed in the United States for oral anti-cancer drugs, where spending  
6  
7 increased by 37% and utilization increased by 10% between 2006 and 2011(21). While seniors account  
8  
9 for a disproportionate amount of health care expenditure, due to higher morbidity and health service  
10  
11 utilization, populating ageing has only a modest effect on growth. CIHI's National Health Expenditure  
12  
13 Trends report estimates growth in overall health expenditure attributable to ageing as only 0.9% per  
14  
15 year(22). Ageing in particular had little impact on expenditure in Saskatchewan. Recent census data  
16  
17 indicates that Saskatchewan's population is growing more quickly than BC's, and is significantly  
18  
19 younger(23). Comparing the two provinces, overall growth in expenditure was higher in Saskatchewan  
20  
21 than it was for BC. Per-capita expenditure in BC was slightly higher than in Saskatchewan at the start of  
22  
23 observation in 2006, as observed previously(10), and decreased from 2006 to 2007, exaggerating the  
24  
25 difference in growth rates. Changes in indication for two major drugs in BC, bevacizumab for colorectal  
26  
27 cancer and trastuzumab for breast cancer, led to reduced expenditure in 2007  
28  
29  
30  
31  
32

33 Our stratified analysis revealed significant variability in trends. Growth in expenditure was fastest for  
34  
35 oral drugs in both provinces, due in part to a change in the product mix over time. A US study found  
36  
37 biologics increased from 35% to 59% of total oral anti-cancer drug spending from 2006 to 2011, while  
38  
39 hormonal agents fell from 42% to 19%(21). Generic hormonal agents became available over the study  
40  
41 period, reflected in the decrease in cost observed in the oral breast cancer drugs. Growth was largest for  
42  
43 lung cancer and "other" cancers, reflecting recent changes in therapies for less common cancers.  
44  
45

46 Between 2005 and 2014, the majority of new oncology drugs were for rarer indications, including renal  
47  
48 cancer, lymphoma, and chronic myelogenous leukemia(8). Growth in total expenditure was highest in  
49  
50 the older age groups, particularly for oral drugs. There is a perception that oral agents have reduced  
51  
52 toxicity(9, 24) and as a result we might expect to see increased utilization among older patients who  
53  
54  
55  
56  
57  
58  
59  
60



1  
2  
3 may not otherwise be candidates for systemic therapy; however, the number of users and prescription  
4  
5 volume increased at roughly the same rate among older and younger patients.  
6  
7

8 Isolating the underlying trends reveals that the largest growth is observed in cost per dispensed  
9  
10 prescription, at 3% and 5% per year in all drugs and 8% and 11% per year for oral drugs, in BC and  
11  
12 Saskatchewan respectively. The unit cost of drugs, particularly for oral drugs, is responsible for the most  
13  
14 growth in expenditure. Growth was especially high in prostate cancer due to the introduction of  
15  
16 abiraterone, an orally-administered CYP17 inhibitor, toward the end of the study period. The exception  
17  
18 to this pattern was colorectal cancer, where the observed growth in all other components exceeded the  
19  
20 growth in cost for oral systemic therapy. Most oral therapy for colorectal cancer was with capecitabine,  
21  
22 where utilization steadily increased over time.  
23  
24  
25

26  
27 What is the value that healthcare systems are realizing on systemic therapy spending? Measuring value  
28  
29 for money is outside the scope of the current analysis, but is central to understanding the implications of  
30  
31 these trends. Growth in systemic therapy expenditure may be appropriate if therapeutic benefit to  
32  
33 patients is growing correspondingly; however, there is mounting evidence that patient benefit is  
34  
35 decreasing over time relative to price(25). The list price of new anti-cancer drugs has increased by 12%  
36  
37 per year for drugs approved in the US between 1996 and 2014(1). In the UK, daily drug cost increased  
38  
39 from £50/day (approximately CAD\$90/day) for drugs introduced in 2000-2004, to £144/day  
40  
41 (CAD\$270/day) in 2005-2009 and £160/day (CAD\$300/day) in 2010-2014(8). Cost-effectiveness ratios  
42  
43 have been rising over time for newly-approved anti-cancer drugs, with an estimated US\$54,100 per year  
44  
45 of life for drugs launched in 1995 and US\$207,000 per year of life for drugs launched in 2013, an  
46  
47 increase of nearly four-fold(1). Rising prices are attributable in part to reference pricing, where a  
48  
49 product's launch price is set incrementally higher than existing therapies, and to compensating for  
50  
51 mandated or negotiated discounts(1). At a threshold of US\$100,000 per year of life, net benefit for total  
52  
53  
54  
55  
56  
57  
58  
59  
60

1  
2  
3 drug expenditure at current levels remains positive, but as expenditure growth outpaces therapeutic  
4 benefit value for money diminishes(26).  
5  
6  
7

8 This study has a number of limitations arising from the use of administrative data. Our analysis uses a  
9 patient's last diagnosis as a proxy for indication of therapy, and there may be some misclassification in  
10 cases where patients with multiple primary cancers are receiving treatment for the earlier diagnosis.  
11  
12

13 Data on specific indications (for example, adjuvant vs. palliative indications) would provide additional  
14 insight into drug utilization. Administrative data also cannot provide important contextual information,  
15 such as the impact of provider practice patterns, patient preference, or shared decision-making on these  
16 trends. Patients tend to prefer oral agents for convenience and comfort(24), but managing adherence  
17 and monitoring toxicity may be more challenging for patients administering oral therapy at home(9, 27).  
18  
19

20 Understanding these factors with qualitative or mixed-methods research would provide important  
21 insight into the trends observed here. Our results are also limited by the time frame of our analysis. New  
22 therapies are adopted by cancer agencies on an ongoing basis. Since 2013, the largest change to the  
23 systemic therapy landscape has been the introduction of immune checkpoint inhibitors for the  
24 treatment of several cancers. The expenditure trends we observed will have likely continued beyond  
25 2013 with the use of these and other novel systemic therapy agents, but this should be confirmed with  
26 additional years of observation. Additional data would also allow for a more sophisticated time-series or  
27 joinpoint analysis, where changes in the growth rate over time are identified using segmented  
28 regression(28). Our study has too few time points to implement these methods(29); consequently, this  
29 analysis assumes a constant rate of change, and cannot identify changes in growth associated with  
30 specific policy changes or time-varying factors. Finally, the cost information in our data does not reflect  
31 negotiated volume discounts or rebates from manufacturers. Data from Europe indicate actual prices  
32 can be as much as 58% lower than list price(30). Our analysis therefore overestimates expenditures, but  
33  
34  
35  
36  
37  
38  
39  
40  
41  
42  
43  
44  
45  
46  
47  
48  
49  
50  
51  
52  
53  
54  
55  
56  
57  
58  
59  
60

1  
2  
3 the magnitude of this effect is unknown due to the confidential nature of these negotiated pricing  
4  
5 agreements.  
6

7  
8 Expenditure on systemic therapy drugs for cancer is increasing over time; our analysis indicates the  
9  
10 largest contributor to this growth is price, reflected in the cost per dispensed prescription. While the  
11  
12 magnitude of this growth and balance between the cost drivers varies by cancer type, similar patterns  
13  
14 were observed in BC and Saskatchewan, and these findings are likely generalizable across Canadian  
15  
16 jurisdictions. Understanding the drivers of health care expenditure is only the first step toward assessing  
17  
18 the value of services and setting priorities for the allocation of scarce resources.  
19  
20  
21  
22  
23  
24  
25  
26  
27  
28  
29  
30  
31  
32  
33  
34  
35  
36  
37  
38  
39  
40  
41  
42  
43  
44  
45  
46  
47  
48  
49  
50  
51  
52  
53  
54  
55  
56  
57  
58  
59  
60

Confidential

## References

1. Howard DH, Bach PB, Berndt ER, Conti RM. Pricing in the Market for Anticancer Drugs. *Journal of Economic Perspectives*. 2015;29(1):139-62.
2. Canadian Institute for Health Information. *Drivers of Prescription Drug Spending in Canada*. Ottawa ON: CIHI; 2011.
3. van den Broek CBM, Bastiaannet E, Dekker JWT, Portielje JEA, de Craen AJM, Elferink MAG, et al. Time trends in chemotherapy (administration and costs) and relative survival in stage III colon cancer patients – a large population-based study from 1990 to 2008. *Acta Oncologica*. 2012;52(5):941-9.
4. Warren JL, Yabroff KR, Meekins A, Topor M, Lamont EB, Brown ML. Evaluation of Trends in the Cost of Initial Cancer Treatment. *JNCI Journal of the National Cancer Institute*. 2008;100(12):888-97.
5. de Oliveira C, Bremner KE, Pataky R, Gunraj N, Haq M, Chan K, et al. Trends in use and cost of initial cancer treatment in Ontario: a population-based descriptive study. *CMAJ open*. 2013;1(4):E151-8.
6. Canadian Cancer Society's Advisory Committee on Cancer Statistics. *Canadian Cancer Statistics, 2015: Predictions of the future burden of cancer in Canada*. Toronto, ON: Canadian Cancer Society; 2015.
7. Ellison LF, Wilkins K. Canadian trends in cancer prevalence. *Health reports*. 2012;23(1):7-16.
8. Savage P, Mahmoud S. Development and economic trends in cancer therapeutic drugs: a 5-year update 2010-2014. *British Journal of Cancer*. 2015;112(6):1037-41.
9. Weingart SN, Brown E, Bach PB, Eng K, Johnson SA, Kuzel TM, et al. NCCN Task Force Report: Oral chemotherapy. *Journal of the National Comprehensive Cancer Network : JNCCN*. 2008;6 Suppl 3:S1-14.
10. Chafe R, Culyer A, Dobrow M, Coyte PC, Sawka C, O'Reilly S, et al. Access to Cancer Drugs in Canada: Looking Beyond Coverage Decisions. *Healthcare Policy*. 2011;6(3):27-35.
11. Canadian Institute for Health Information. *Prescribed Drug Spending in Canada, 2016: A Focus on Public Drug Programs*. Ottawa, ON: CIHI; 2016.
12. BC Cancer Agency. Systemic Therapy [Internet]. 2018 [February 23, 2018]. Available from: <http://www.bccancer.bc.ca/health-professionals/clinical-resources/systemic-therapy>.
13. Saskatchewan Cancer Agency. Drug Formulary [Internet]. 2018 [February 23, 2018]. Available from: <http://www.saskcancer.ca/Default.aspx?DN=65ff1ca8-d3ad-4dc6-af62-d2f08805171c&Anc=65ff1ca8-d3ad-4dc6-af62-d2f08805171c&Pa=99aa6ede-a51a-487d-b7e1-8638b16c48fa>.
14. Statistics Canada. Table 326-0021 - Consumer Price Index, annual. CANSIM (database); 2013.
15. BC Cancer Agency. BC Cancer Registry - About the Registry [Internet]. 2018 [February 23, 2018]. Available from: <http://www.bccancer.bc.ca/health-professionals/professional-resources/bc-cancer-registry/about-the-registry>.
16. Saskatchewan Cancer Agency. Cancer Registry [Internet]. 2018 [February 23, 2018]. Available from: <http://www.saskcancer.ca/Default.aspx?DN=e5d0bf2c-5345-4366-bbaa-c0562929c49c>.
17. Statistics Canada. Table 051-0001 - Estimates of population, by age group and sex for July 1, Canada, provinces and territories, annual (persons). CANSIM (database); 2013.
18. Canadian Cancer Society's Advisory Committee on Cancer Statistics. Appendix II: Data sources and Methods; *Canadian Cancer Statistics*. Toronto ON: Canadian Cancer Society; 2015.
19. McGrail KM, Evans RG, Barer ML, Kerluke KJ, McKendry R. Diagnosing senescence: contributions to physician expenditure increases in British Columbia, 1996/97 to 2005/06. *Healthcare policy = Politiques de sante*. 2011;7(1):41-54.
20. Rothman KJ. *Epidemiology: an introduction*. 2nd ed. New York: Oxford University Press; 2012.

- 1
  - 2
  - 3
  - 4
  - 5
  - 6
  - 7
  - 8
  - 9
  - 10
  - 11
  - 12
  - 13
  - 14
  - 15
  - 16
  - 17
  - 18
  - 19
  - 20
  - 21
  - 22
  - 23
  - 24
  - 25
  - 26
  - 27
  - 28
  - 29
  - 30
  - 31
  - 32
  - 33
  - 34
  - 35
  - 36
  - 37
  - 38
  - 39
  - 40
  - 41
  - 42
  - 43
  - 44
  - 45
  - 46
  - 47
  - 48
  - 49
  - 50
  - 51
  - 52
  - 53
  - 54
  - 55
  - 56
  - 57
  - 58
  - 59
  - 60
21. Conti RM, Fein AJ, Bhatta SS. National trends in spending on and use of oral oncologics, first quarter 2006 through third quarter 2011. *Health Affairs*. 2014;33(10):1721-7.
22. Canadian Institute for Health Information. National Health Expenditure Trends, 1975 to 2015. Ottawa: ON; 2015 October 2015.
23. Statistics Canada. Relationship between population growth and aging for various regions in Canada (Catalogue no. 98-505-X2016001) [Internet]. 2017 [updated May 8, 2017]. Available from: <http://www12.statcan.gc.ca/census-recensement/2016/dp-pd/dv-vd/scatterplot-diagrammededispersion/index-en.html>.
24. Aisner J. Overview of the changing paradigm in cancer treatment: oral chemotherapy. *American Journal Of Health-System Pharmacy: AJHP: Official Journal Of The American Society Of Health-System Pharmacists*. 2007;64(9 Suppl 5):S4-S7.
25. Cressman S, Browman GP, Hoch JS, Kovacic L, Peacock SJ. A Time-Trend Economic Analysis of Cancer Drug Trials. *Oncologist*. 2015;20(7):729-36.
26. Salas-Vega S, Mossialos E. Cancer Drugs Provide Positive Value In Nine Countries, But The United States Lags In Health Gains Per Dollar Spent. *Health Affairs*. 2016;35(5):813-23.
27. Wong SF, Bounthavong M, Nguyen CP, Chen T. Outcome Assessments and Cost Avoidance of an Oral Chemotherapy Management Clinic. *Journal of the National Comprehensive Cancer Network : JNCCN*. 2016;14(3):279-85.
28. Clegg LX, Hankey BF, Tiwari R, Feuer EJ, Edwards BK. Estimating average annual per cent change in trend analysis. *Statistics in medicine*. 2009;28(29):3670-82.
29. Zhang F, Wagner AK, Ross-Degnan D. Simulation-based power calculation for designing interrupted time series analyses of health policy interventions. *Journal of Clinical Epidemiology*. 2011;64(11):1252-61.
30. van Harten WH, Wind A, de Paoli P, Saghatchian M, Oberst S. Actual costs of cancer drugs in 15 European countries. *Lancet Oncol*. 2016;17(1):18-20.

## Figure captions

Figure 1 – Unadjusted growth in number of users, prescriptions, and expenditure in British Columbia and Saskatchewan, relative to 2006. Growth in Saskatchewan is represented by solid lines (SK in legend); growth in British Columbia is represented by dashed lines (BC in legend).

Figure 2 – Growth in expenditure, adjusted for population growth and ageing, in British Columbia and Saskatchewan, relative to 2006. Growth in Saskatchewan is represented by solid lines (SK in legend); growth in British Columbia is represented by dashed lines (BC in legend).

Confidential

## Appendix 1

Oral systemic therapy drugs:

|                  |                     |              |
|------------------|---------------------|--------------|
| abiraterone      | etoposide           | nilotinib    |
| acitretin        | everolimus          | nilutamide   |
| anagrelide       | exemestane          | pazopanib    |
| anastrozole      | fludarabine         | prednisolone |
| bicalutamide     | flutamide           | prednisone   |
| bromocriptine    | gefitinib           | procarbazine |
| busulfan         | hydroxyurea         | quinagolide  |
| cabergoline      | imatinib            | ruxolitinib  |
| capecitabine     | isotretinoin        | sorafenib    |
| chlorambucil     | lapatinib           | sunitinib    |
| clodronate       | lenalidomide        | tamoxifen    |
| crizotinib       | letrozole           | temozolomide |
| cyclophosphamide | lomustine           | thalidomide  |
| cyclosporine     | medroxyprogesterone | thioguanine  |
| cyproterone      | megestrol           | tretinoin    |
| dasatinib        | melphalan           | vemurafenib  |
| enzalutamide     | mercaptopurine      | vismodegib   |
| erlotinib        | methotrexate        |              |
| estramustine     | mitotane            |              |

Figure 1 – Unadjusted growth in number of users, prescriptions, and expenditure in British Columbia and Saskatchewan, relative to 2006. Growth in Saskatchewan is represented by solid lines (SK in legend); growth in British Columbia is represented by dashed lines (BC in legend).

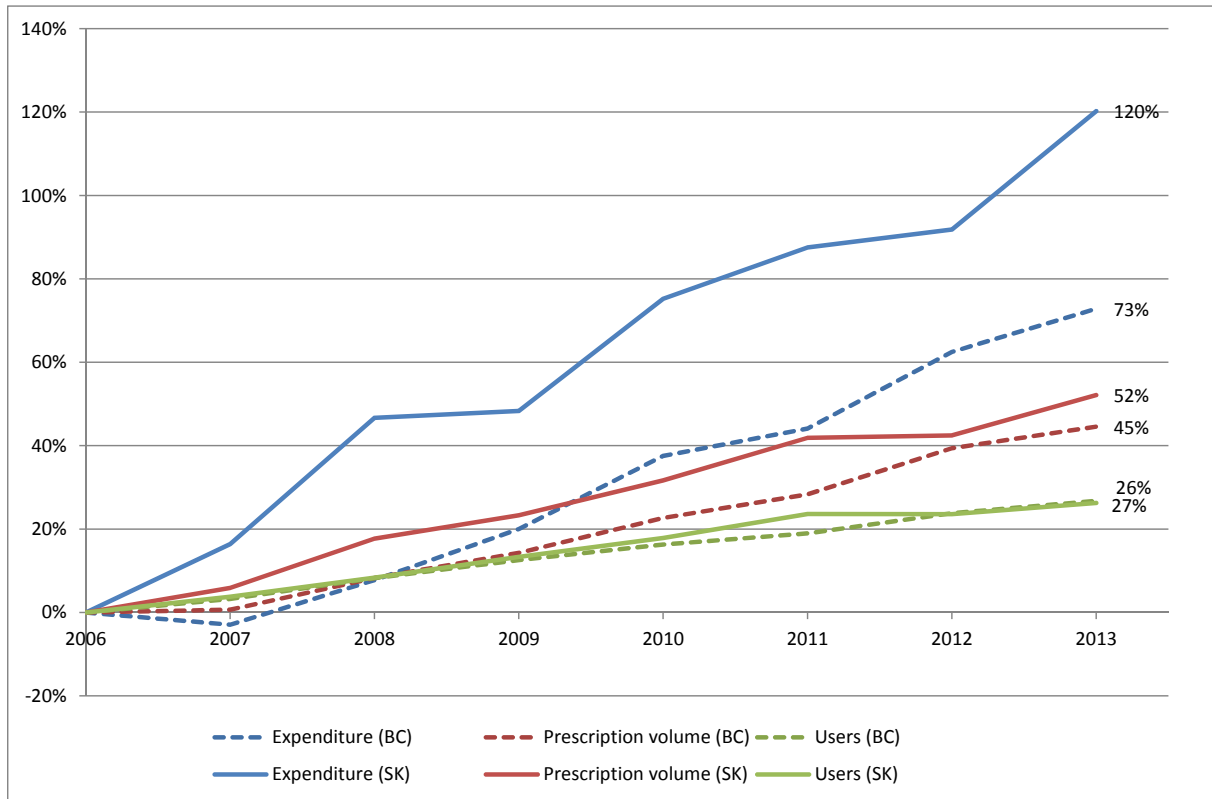



1  
2  
3  
4  
5  
6  
7  
8  
9  
10  
11  
12  
13  
14  
15  
16  
17  
18  
19  
20  
21  
22  
23  
24  
25  
26  
27  
28  
29  
30  
31  
32  
33  
34  
35  
36  
37  
38  
39  
40  
41  
42  
43  
44  
45  
46  
47  
48  
49  
50  
51  
52  
53  
54  
55  
56  
57  
58  
59  
60

Figure 2 – Growth in expenditure, adjusted for population growth and ageing, in British Columbia and Saskatchewan, relative to 2006. Growth in Saskatchewan is represented by solid lines (SK in legend); growth in British Columbia is represented by dashed lines (BC in legend).

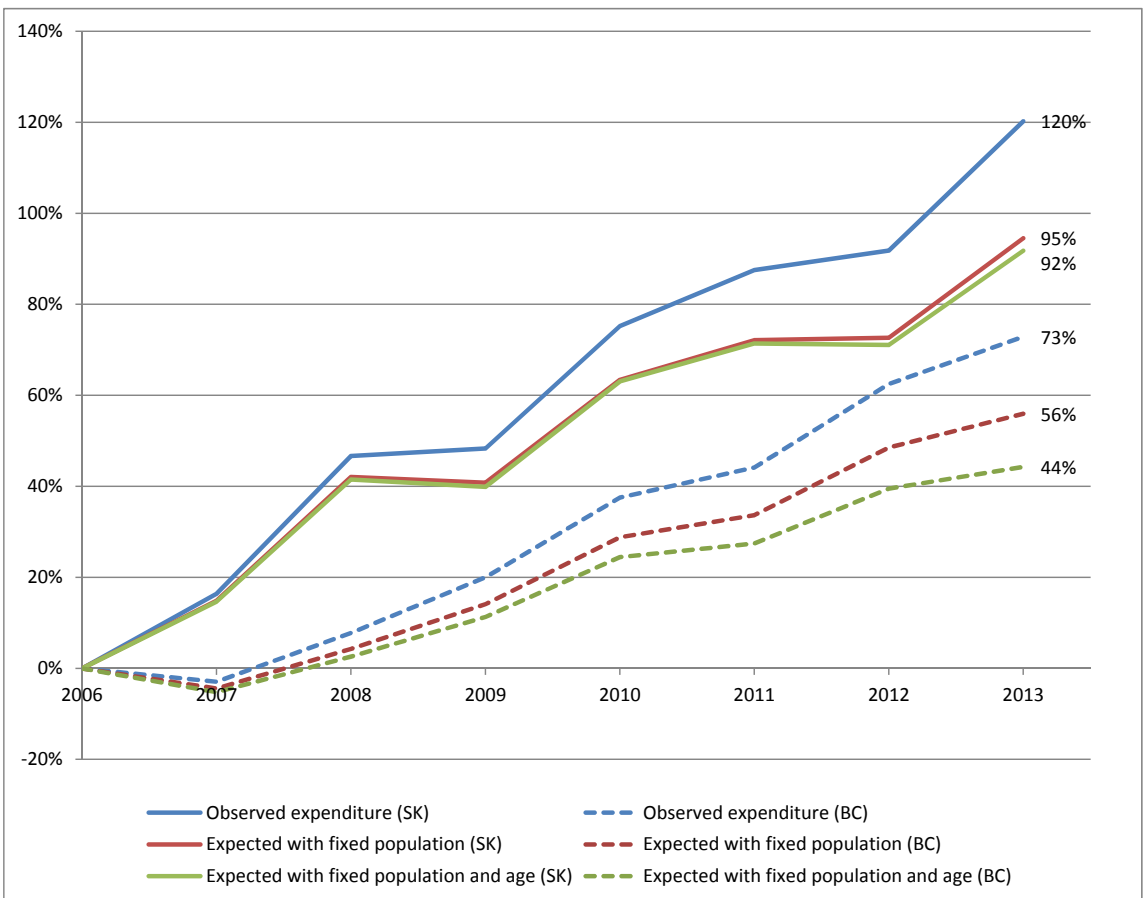

Table 1 - Unique systemic therapy users and systemic therapy prescription characteristics by province, 2006-2013

|                                |            | British Columbia |                  | Saskatchewan |                  |
|--------------------------------|------------|------------------|------------------|--------------|------------------|
| <b>Dispensed prescriptions</b> |            | N                | % (95% CI)       | N            | % (95% CI)       |
| Total                          |            | 2,100,947        |                  | 585,476      |                  |
| Route                          | Oral       | 688,522          | 32.8 (32.7-32.8) | 202,071      | 34.5 (34.4-34.6) |
|                                | Other      | 1,412,425        | 67.2 (67.2-67.3) | 383,405      | 65.5 (65.4-65.6) |
| Indication                     | Breast     | 573,376          | 27.3 (27.2-27.4) | 124,971      | 21.3 (21.2-21.5) |
|                                | Colorectal | 420,224          | 20.0 (19.9-20.1) | 176,161      | 30.1 (30.0-30.2) |
|                                | Lung       | 106,866          | 5.1 (5.1-5.1)    | 33,995       | 5.8 (5.7-5.9)    |
|                                | Prostate   | 197,864          | 9.4 (9.4-9.5)    | 51,813       | 8.8 (8.8-8.9)    |
|                                | Other      | 802,617          | 38.2 (38.1-38.3) | 198,536      | 33.9 (33.8-34.0) |
| <b>Patient characteristics</b> |            | N                | % (95% CI)       | N            | % (95% CI)       |
| Total                          |            | 103,680          |                  | 23,108       |                  |
| Sex                            | Male       | 48,240           | 46.5 (46.2-46.8) | 11,240       | 48.6 (48.0-49.3) |
|                                | Female     | 55,510           | 53.5 (53.2-53.8) | 11,868       | 51.4 (50.7-52.0) |
| Age                            | <50 years  | 13,619           | 13.1 (12.9-13.3) | 2,733        | 11.8 (11.4-12.2) |
|                                | 50-59      | 20,196           | 19.5 (19.2-19.7) | 4,453        | 19.3 (18.8-19.8) |
|                                | 60-69      | 28,377           | 27.4 (27.1-27.6) | 6,184        | 26.8 (26.2-27.3) |
|                                | 70-79      | 26,501           | 25.6 (25.3-25.8) | 6,385        | 27.6 (27.1-28.2) |
|                                | ≥80 years  | 14,987           | 14.5 (14.2-14.7) | 3,353        | 14.5 (14.1-15.0) |
| Age in years                   | Mean (SD)  | 64.9 (13.6)      | 64.8-65.0        | 65.5 (13.3)  | 65.3-65.7        |
| Cancer site                    | Breast     | 29,552           | 28.5 (28.2-28.8) | 6,059        | 26.2 (25.7-26.8) |
|                                | Colorectal | 9,861            | 9.5 (9.3-9.7)    | 2,354        | 10.2 (9.8-10.6)  |
|                                | Lung       | 7,624            | 7.4 (7.2-7.5)    | 2,081        | 9.0 (8.6-9.4)    |
|                                | Prostate   | 17,516           | 16.9 (16.7-17.1) | 4,233        | 18.3 (17.8-18.8) |
|                                | Other      | 39,127           | 37.7 (37.4-38.0) | 8,381        | 36.3 (35.6-36.9) |

Abbreviations: SD, standard deviation; CI, confidence interval

Table 2 - Annual percent change by component in British Columbia

|                          |             | Change in total expenditure per capita | Change in cancer incidence per capita* | Change in users per incident case | Change in prescriptions per user | Change in cost per prescription |
|--------------------------|-------------|----------------------------------------|----------------------------------------|-----------------------------------|----------------------------------|---------------------------------|
|                          |             | % (95% CI)                             | % (95% CI)                             | % (95% CI)                        | % (95% CI)                       | % (95% CI)                      |
| <b>Total</b>             |             | <b>6.6 (5.4, 7.7)</b>                  | -0.4 (-1.1, 0.3)                       | <b>1.4 (0.8, 2.1)</b>             | <b>2.2 (1.7, 2.7)</b>            | <b>3.2 (2.5, 3.9)</b>           |
| <b>Oral agents</b>       |             | <b>13.1 (10.7, 15.6)</b>               | -0.4 (-1.1, 0.3)                       | <b>2.0 (1.4, 2.6)</b>             | <b>3.0 (2.7, 3.3)</b>            | <b>8.1 (6.0, 10.2)</b>          |
| <b>IV (other) agents</b> |             | <b>3.8 (2.7, 5.0)</b>                  | -0.4 (-1.1, 0.3)                       | <b>1.5 (0.8, 2.2)</b>             | <b>1.5 (1.0, 2.0)</b>            | <b>1.2 (0.6, 1.9)</b>           |
| Oral                     | Breast      | <b>-11.4 (-17.8, -4.5)</b>             | <b>1.1 (0.1, 2.2)</b>                  | 0.0 (-1.1, 1.0)                   | <b>0.9 (0.4, 1.3)</b>            | <b>-13.0 (-19.1, -6.6)</b>      |
|                          | Colorectal  | <b>5.7 (3.4, 8.2)</b>                  | 0.3 (-0.4, 0.9)                        | <b>3.4 (1.7, 5.1)</b>             | <b>2.8 (1.6, 3.9)</b>            | -0.7 (-1.6, 0.3)                |
|                          | Lung        | <b>12.6 (9.7, 15.6)</b>                | <b>-1.6 (-2.4, -0.8)</b>               | <b>8.5 (6.3, 10.7)</b>            | <b>1.3 (0.2, 2.4)</b>            | <b>4.0 (2.7, 5.4)</b>           |
|                          | Prostate    | <b>26.4 (9.3, 46.2)</b>                | <b>-4.0 (-5.7, -2.4)</b>               | <b>3.3 (1.8, 4.8)</b>             | <b>5.7 (4.3, 7.2)</b>            | <b>20.6 (4.8, 38.7)</b>         |
|                          | Other       | <b>19.7 (15.1, 24.4)</b>               | 0.5 (-0.3, 1.3)                        | <b>3.2 (2.2, 4.1)</b>             | <b>4.3 (3.6, 4.9)</b>            | <b>10.7 (7.2, 14.3)</b>         |
| IV                       | Breast      | -1.3 (-2.8, 0.2)                       | <b>1.1 (0.1, 2.2)</b>                  | 0.9 (-0.3, 2.0)                   | <b>-0.6 (-1.1, -0.1)</b>         | <b>-2.6 (-3.4, -1.8)</b>        |
|                          | Colorectal  | <b>6.1 (3.0, 9.3)</b>                  | 0.3 (-0.4, 0.9)                        | <b>2.6 (1.4, 3.8)</b>             | -0.2 (-1.0, 0.7)                 | <b>3.4 (1.2, 5.7)</b>           |
|                          | Lung        | <b>11.7 (8.2, 15.3)</b>                | <b>-1.6 (-2.4, -0.8)</b>               | 1.0 (-0.4, 2.4)                   | <b>0.7 (0.5, 0.9)</b>            | <b>11.6 (8.5, 14.7)</b>         |
|                          | Prostate    | <b>-2.5 (-3.1, -2.0)</b>               | <b>-4.0 (-5.7, -2.4)</b>               | <b>2.8 (1.6, 3.9)</b>             | <b>1.3 (1.0, 1.6)</b>            | <b>-2.4 (-2.9, -1.8)</b>        |
|                          | Other       | <b>8.0 (6.5, 9.5)</b>                  | 0.5 (-0.3, 1.3)                        | <b>2.3 (1.2, 3.3)</b>             | <b>1.3 (0.5, 2.1)</b>            | <b>3.7 (2.5, 5.0)</b>           |
| Oral                     | < 50 years  | 7.4 (-14.5, 34.9)                      | <b>1.4 (0.4, 2.3)</b>                  | <b>1.9 (1.4, 2.4)</b>             | <b>2.6 (2.2, 3.0)</b>            | 1.3 (-0.2, 2.9)                 |
|                          | 50-59 years | 11.8 (-5.5, 32.3)                      | 0.4 (-0.3, 1.1)                        | <b>1.1 (0.4, 1.9)</b>             | <b>3.0 (2.3, 3.6)</b>            | <b>6.9 (3.7, 10.2)</b>          |
|                          | 60-69 years | 14.5 (-1.9, 33.6)                      | -0.7 (-1.7, 0.3)                       | <b>2.3 (1.3, 3.3)</b>             | <b>2.9 (2.4, 3.5)</b>            | <b>9.4 (6.5, 12.4)</b>          |
|                          | 70-79 years | <b>16.1 (1.9, 32.2)</b>                | -0.4 (-1.1, 0.2)                       | <b>1.7 (1.2, 2.2)</b>             | <b>3.3 (3.0, 3.7)</b>            | <b>11.0 (8.7, 13.4)</b>         |
|                          | ≥ 80 years  | <b>13.8 (0.9, 28.3)</b>                | <b>-1.4 (-2.4, -0.3)</b>               | <b>2.5 (1.5, 3.5)</b>             | <b>3.1 (2.7, 3.5)</b>            | <b>9.2 (7.0, 11.5)</b>          |
| IV                       | < 50 years  | 2.0 (-14.0, 20.9)                      | <b>1.4 (0.4, 2.3)</b>                  | 0.3 (-0.7, 1.4)                   | -0.5 (-1.1, 0.2)                 | 0.8 (-0.2, 1.8)                 |
|                          | 50-59 years | 2.2 (-9.3, 15.2)                       | 0.4 (-0.3, 1.1)                        | 0.6 (-0.3, 1.6)                   | 0.1 (-0.6, 0.7)                  | <b>1.2 (0.2, 2.1)</b>           |
|                          | 60-69 years | 3.4 (-5.4, 12.9)                       | -0.7 (-1.7, 0.3)                       | <b>1.5 (0.5, 2.6)</b>             | <b>1.1 (0.7, 1.6)</b>            | <b>1.4 (0.5, 2.4)</b>           |
|                          | 70-79 years | 6.5 (-3.6, 17.6)                       | -0.4 (-1.1, 0.2)                       | <b>1.7 (1.2, 2.2)</b>             | <b>3.8 (3.3, 4.3)</b>            | <b>1.3 (0.5, 2.0)</b>           |
|                          | ≥ 80 years  | 5.8 (-10.3, 24.8)                      | <b>-1.4 (-2.4, -0.3)</b>               | <b>2.4 (1.5, 3.4)</b>             | <b>4.4 (3.0, 5.9)</b>            | 0.3 (-0.6, 1.1)                 |

Standardized to pooled British Columbia and Saskatchewan population for 2013

\*does not change with route of administration

Table 3 - Annual percent change by component in Saskatchewan

|                 |             | Change in total<br>expenditure per capita | Change in cancer<br>incidence per<br>capita* | Change in users per<br>incident case | Change in<br>prescriptions per user | Change in cost per<br>prescription |
|-----------------|-------------|-------------------------------------------|----------------------------------------------|--------------------------------------|-------------------------------------|------------------------------------|
|                 |             | % (95% CI)                                | % (95% CI)                                   | % (95% CI)                           | % (95% CI)                          | % (95% CI)                         |
| Total           |             | <b>9.2 (7.2, 11.2)</b>                    | 0.2 (-0.3, 0.6)                              | <b>1.9 (1.2, 2.5)</b>                | <b>2.2 (1.8, 2.6)</b>               | <b>4.7 (3.5, 6.0)</b>              |
| Oral agents     |             | <b>16.5 (13.6, 19.6)</b>                  | 0.2 (-0.3, 0.6)                              | <b>2.0 (1.1, 2.9)</b>                | <b>3.2 (1.8, 4.6)</b>               | <b>10.6 (7.8, 13.5)</b>            |
| IV/other agents |             | <b>6.7 (4.6, 8.8)</b>                     | 0.2 (-0.3, 0.6)                              | <b>2.0 (1.3, 2.7)</b>                | <b>1.4 (0.7, 2.1)</b>               | <b>2.9 (1.9, 4)</b>                |
| Oral            | Breast      | <b>10.8 (4.9, 17.1)</b>                   | 0.4 (-0.3, 1.2)                              | 3.0 (1.3, 4.7)                       | 2.0 (-0.3, 4.2)                     | 5.3 (-0.2, 11.0)                   |
|                 | Colorectal  | <b>6.5 (2.7, 10.4)</b>                    | <b>4.4 (3.0, 5.8)</b>                        | 3.2 (0.0, 6.5)                       | <b>8.0 (5.8, 10.2)</b>              | <b>-8.4 (-10.5, -6.2)</b>          |
|                 | Lung        | <b>24.3 (4.0, 48.5)</b>                   | 0.3 (-0.7, 1.3)                              | <b>4.0 (1.3, 6.8)</b>                | 0.4 (-1.1, 2.0)                     | <b>19.6 (0.8, 41.9)</b>            |
|                 | Prostate    | <b>31.9 (12.0, 55.4)</b>                  | <b>-4.9 (-7.3, -2.4)</b>                     | <b>3.2 (0.9, 5.4)</b>                | 1.4 (-1.6, 4.5)                     | <b>31.6 (12.9, 53.4)</b>           |
|                 | Other       | <b>16.9 (13.0, 21.0)</b>                  | 0.2 (-0.8, 1.2)                              | <b>1.2 (0.1, 2.4)</b>                | <b>4.2 (3.1, 5.4)</b>               | <b>10.6 (6.6, 14.6)</b>            |
| IV              | Breast      | -2.8 (-6.0, 0.5)                          | 0.4 (-0.3, 1.2)                              | -0.7 (-2.4, 1.1)                     | 0.4 (-0.9, 1.6)                     | <b>-2.8 (-4.6, -0.9)</b>           |
|                 | Colorectal  | <b>14.0 (7.8, 20.6)</b>                   | <b>4.4 (3.0, 5.8)</b>                        | -1.5 (-4.3, 1.3)                     | 0.2 (-0.8, 1.2)                     | <b>10.6 (6.8, 14.6)</b>            |
|                 | Lung        | <b>11.8 (8.2, 15.6)</b>                   | 0.3 (-0.7, 1.3)                              | 1.8 (-0.2, 3.8)                      | <b>1.5 (0.2, 2.9)</b>               | <b>7.8 (5.7, 9.9)</b>              |
|                 | Prostate    | 1.0 (-1.0, 3.0)                           | <b>-4.9 (-7.3, -2.4)</b>                     | <b>6.1% (3.1, 9.1)</b>               | <b>4.1 (2.9, 5.3)</b>               | <b>-3.7 (-5.1, -2.4)</b>           |
|                 | Other       | <b>10.6 (8.8, 12.4)</b>                   | 0.2 (-0.8, 1.2)                              | <b>4.1 (3.2, 5.1)</b>                | 1.3 (0.0, 2.7)                      | <b>4.6 (3.0, 6.1)</b>              |
| Oral            | < 50 years  | 14.1 (-11.4, 46.9)                        | <b>1.6 (0.5, 2.6)</b>                        | <b>3.9 (3.0, 4.9)</b>                | <b>1.9 (0.0, 3.7)</b>               | <b>5.6 (3.9, 7.4)</b>              |
|                 | 50-59 years | 13.5 (-6.5, 37.9)                         | -0.7 (-1.9, 0.6)                             | <b>3.5 (1.6, 5.6)</b>                | <b>3.9 (1.9, 5.9)</b>               | 6.5 (-0.6, 14.2)                   |
|                 | 60-69 years | <b>20.3 (3.7, 39.5)</b>                   | <b>-1.0 (-1.6, -0.4)</b>                     | <b>4.6 (3.2, 6.0)</b>                | <b>3.6 (1.7, 5.5)</b>               | <b>12.1 (9.4, 14.9)</b>            |
|                 | 70-79 years | <b>18.7 (4.2, 35.2)</b>                   | <b>1.0 (0.1, 1.9)</b>                        | 0.6 (-0.7, 2.0)                      | <b>2.1 (0.6, 3.5)</b>               | <b>14.5 (12.7, 16.3)</b>           |
|                 | ≥ 80 years  | 11.4 (-1.4, 25.8)                         | 0.6 (-0.4, 1.7)                              | <b>-4.0 (-5.9, -2.2)</b>             | <b>1.6 (0.0, 3.2)</b>               | <b>13.8 (8.0, 19.9)</b>            |
| IV              | < 50 years  | 6.3 (-12.1, 28.6)                         | <b>1.6 (0.5, 2.6)</b>                        | 0.8 (-0.3, 1.9)                      | <b>3.0 (1.2, 4.7)</b>               | 0.8 (-1.0, 2.7)                    |
|                 | 50-59 years | 7.4 (-4.3, 20.4)                          | -0.7 (-1.9, 0.6)                             | <b>2.8 (1.4, 4.3)</b>                | <b>2.2 (1.0, 3.4)</b>               | <b>2.8 (1.6, 4.0)</b>              |
|                 | 60-69 years | 6.5 (-1.6, 15.1)                          | <b>-1.0 (-1.6, -0.4)</b>                     | <b>2.8 (1.3, 4.4)</b>                | 1.0 (-0.4, 2.4)                     | <b>3.5 (2.5, 4.5)</b>              |
|                 | 70-79 years | 8.2 (-1.7, 19.2)                          | <b>1.0 (0.1, 1.9)</b>                        | <b>1.8 (0.9, 2.8)</b>                | 0.6 (-0.9, 2.2)                     | <b>4.5 (3.2, 5.8)</b>              |
|                 | ≥ 80 years  | 0.5 (-14.0, 17.5)                         | 0.6 (-0.4, 1.7)                              | 0.9 (-0.6, 2.3)                      | -2.3 (-4.6, 0.1)                    | 1.2 (-2.1, 4.7)                    |

Standardized to pooled British Columbia and Saskatchewan population for 2013

\*does not change with route of administration

Supplementary Table S1 - Total systemic therapy expenditure, prescription volume, and number of users by year, 2006-2013

|      | British Columbia |                     |        | Saskatchewan |                     |       |
|------|------------------|---------------------|--------|--------------|---------------------|-------|
|      | Expenditure      | Prescription volume | Users  | Expenditure  | Prescription volume | Users |
| 2006 | 119,009,671      | 219,227             | 26,875 | 24,501,738   | 57,673              | 5,928 |
| 2007 | 115,535,452      | 220,740             | 27,747 | 28,521,196   | 61,080              | 6,154 |
| 2008 | 128,270,693      | 237,430             | 29,093 | 35,942,647   | 67,890              | 6,423 |
| 2009 | 142,838,050      | 250,612             | 30,257 | 36,345,382   | 71,118              | 6,719 |
| 2010 | 163,691,852      | 268,975             | 31,261 | 42,935,143   | 75,956              | 6,987 |
| 2011 | 171,535,815      | 281,408             | 31,979 | 45,952,956   | 81,830              | 7,328 |
| 2012 | 193,387,901      | 305,602             | 33,282 | 47,003,157   | 82,174              | 7,327 |
| 2013 | 205,722,695      | 316,953             | 34,069 | 53,965,596   | 87,755              | 7,485 |

Expenditure expressed in 2013 Canadian dollars

Confidential

Supplementary Table S2 - stratified models (British Columbia)

|                                |             | Change in total<br>expenditure per<br>capita | Change in cancer<br>incidence per<br>capita* | Change in users per<br>incident case | Change in<br>prescriptions per<br>user | Change in cost per<br>prescription |                            |
|--------------------------------|-------------|----------------------------------------------|----------------------------------------------|--------------------------------------|----------------------------------------|------------------------------------|----------------------------|
|                                |             | % (95% CI)                                   | % (95% CI)                                   | % (95% CI)                           | % (95% CI)                             | % (95% CI)                         |                            |
| Total                          | Breast      | <b>-3.5 (-4.5, -2.5)</b>                     | <b>1.1 (0.1, 2.2)</b>                        | -0.1 (-1.1, 0.9)                     | <b>0.7 (0.2, 1.2)</b>                  | <b>-5.1 (-6.0, -4.2)</b>           |                            |
|                                | Colorectal  | <b>6.1 (3.4, 8.8)</b>                        | 0.3 (-0.4, 0.9)                              | <b>2.1 (1.2, 3.0)</b>                | <b>0.8 (0.4, 1.2)</b>                  | <b>2.8 (0.8, 4.9)</b>              |                            |
|                                | Lung        | <b>12.1 (10.4, 13.9)</b>                     | <b>-1.6 (-2.4, -0.8)</b>                     | <b>2.6 (1.3, 3.8)</b>                | 0.2 (-0.4, 0.9)                        | <b>10.8 (9.2, 12.4)</b>            |                            |
|                                | Prostate    | 1.0 (-0.8, 2.8)                              | <b>-4.0 (-5.7, -2.4)</b>                     | <b>2.5 (1.2, 3.8)</b>                | <b>3.5 (2.8, 4.1)</b>                  | -0.7 (-2.5, 1.2)                   |                            |
|                                | Other       | <b>12.7 (11.4, 14.0)</b>                     | 0.5 (-0.3, 1.3)                              | <b>2.0 (1.1, 3.0)</b>                | <b>2.6 (1.8, 3.3)</b>                  | <b>7.3 (6.2, 8.3)</b>              |                            |
| Total                          | < 50 years  | <b>3.6 (2.2, 4.9)</b>                        | <b>1.4 (0.4, 2.3)</b>                        | <b>0.9 (0.1, 1.7)</b>                | 0.1 (-0.6, 0.8)                        | <b>1.2 (0.3, 2.2)</b>              |                            |
|                                | 50-59 years | <b>5.0 (3.7, 6.3)</b>                        | 0.4 (-0.3, 1.1)                              | 0.4 (-0.4, 1.2)                      | <b>1.3 (0.5, 2.1)</b>                  | <b>2.9 (1.9, 3.9)</b>              |                            |
|                                | 60-69 years | <b>6.6 (5.1, 8.0)</b>                        | -0.7 (-1.7, 0.3)                             | <b>1.7 (0.7, 2.7)</b>                | <b>1.8 (1.2, 2.3)</b>                  | <b>3.7 (2.8, 4.6)</b>              |                            |
|                                | 70-79 years | <b>9.3 (8.1, 10.5)</b>                       | -0.4 (-1.1, 0.2)                             | <b>1.5 (1.0, 2.1)</b>                | <b>3.8 (3.4, 4.3)</b>                  | <b>4.2 (3.4, 5.0)</b>              |                            |
|                                | ≥ 80 years  | <b>8.2 (7.2, 9.1)</b>                        | <b>-1.4 (-2.4, -0.3)</b>                     | <b>2.0 (1.1, 3.0)</b>                | <b>4.1 (3.5, 4.8)</b>                  | <b>3.2 (2.3, 4.1)</b>              |                            |
| <b>Fully stratified models</b> |             |                                              |                                              |                                      |                                        |                                    |                            |
| Oral                           | Breast      | < 50 years                                   | <b>-6.5 (-9.9, -3.1)</b>                     | -0.3 (-1.7, 1.1)                     | <b>2.9 (1.8, 4.0)</b>                  | <b>0.8 (0.1, 1.5)</b>              | <b>-9.7 (-12.5, -6.7)</b>  |
|                                |             | 50-59 years                                  | <b>-14.0 (-19.6, -8.0)</b>                   | 0.8 (-0.3, 2.0)                      | -0.5 (-1.7, 0.8)                       | <b>0.8 (0.1, 1.5)</b>              | <b>-14.9 (-21.0, -8.4)</b> |
|                                |             | 60-69 years                                  | <b>-11.0 (-18.0, -3.3)</b>                   | <b>1.9 (0.4, 3.4)</b>                | -0.8 (-2.2, 0.7)                       | <b>1.0 (0.4, 1.6)</b>              | <b>-12.7 (-19.6, -5.4)</b> |
|                                |             | 70-79 years                                  | <b>-10.6 (-17.7, -2.8)</b>                   | <b>2.9 (1.2, 4.5)</b>                | -1.0 (-2.3, 0.3)                       | <b>1.8 (1.2, 2.4)</b>              | <b>-13.6 (-20.1, -6.7)</b> |
|                                |             | ≥ 80 years                                   | <b>-11.9 (-19.7, -3.4)</b>                   | -0.3 (-1.9, 1.3)                     | 0.1 (-2.1, 2.4)                        | -0.2 (-2.0, 1.6)                   | <b>-11.4 (-17.7, -4.8)</b> |
|                                | Colorectal  | < 50 years                                   | 2.4 (-3.2, 8.2)                              | <b>6.2 (4.1, 8.4)</b>                | 3.7 (-0.1, 7.7)                        | <b>3.3 (0.9, 5.7)</b>              | <b>-10.2 (-13.6, -6.7)</b> |
|                                |             | 50-59 years                                  | <b>11.0 (7.4, 14.8)</b>                      | <b>1.6 (0.2, 3.1)</b>                | <b>6.0 (3.7, 8.5)</b>                  | <b>2.5 (0.7, 4.5)</b>              | 0.5 (-0.5, 1.5)            |
|                                |             | 60-69 years                                  | <b>7.0 (2.6, 11.6)</b>                       | -0.7 (-1.4, 0.1)                     | <b>4.6 (0.6, 8.8)</b>                  | <b>2.0 (0.2, 3.8)</b>              | 0.9 (-1.0, 2.9)            |
|                                |             | 70-79 years                                  | 1.9 (-0.2, 4.0)                              | -0.4 (-1.3, 0.5)                     | 0.6 (-1.0, 2.4)                        | <b>2.2 (1.1, 3.3)</b>              | -0.5 (-2.0, 0.9)           |
|                                |             | ≥ 80 years                                   | <b>6.3 (2.5, 10.2)</b>                       | -0.2 (-1.7, 1.4)                     | <b>3.1 (1.3, 5.0)</b>                  | <b>3.5 (1.3, 5.7)</b>              | -0.1 (-2.7, 2.6)           |
|                                | Lung        | < 50 years                                   | <b>17.7 (10.1, 25.9)</b>                     | -4.3 (-8.5, 0.1)                     | <b>18.7 (13.7, 23.9)</b>               | 1.5 (-2.6, 5.8)                    | <b>3.1 (0.4, 5.8)</b>      |
|                                |             | 50-59 years                                  | <b>7.9 (5.4, 10.5)</b>                       | -1.7 (-3.6, 0.2)                     | <b>9.3 (6.5, 12.1)</b>                 | 1.6 (-0.8, 4.2)                    | -1.3 (-4.3, 1.9)           |
|                                |             | 60-69 years                                  | <b>14.6 (9.9, 19.5)</b>                      | <b>-2.5 (-3.2, -1.7)</b>             | <b>9.0 (5.5, 12.5)</b>                 | 2.1 (-0.9, 5.3)                    | <b>5.4 (2.7, 8.2)</b>      |
|                                |             | 70-79 years                                  | <b>9.5 (7.3, 11.8)</b>                       | -0.9 (-1.9, 0.1)                     | <b>6.8 (4.3, 9.3)</b>                  | -0.3 (-2.6, 2.0)                   | <b>3.6 (1.3, 6.0)</b>      |
|                                |             | ≥ 80 years                                   | <b>22.0 (16.1, 28.3)</b>                     | -1.1 (-2.4, 0.2)                     | <b>9.0 (4.2, 13.9)</b>                 | 2.3 (-2.3, 7.1)                    | <b>10.1 (4.7, 15.8)</b>    |
|                                | Prostate    | < 50 years                                   | <b>45.4 (17.2, 80.4)</b>                     | -4.4 (-9.4, 1.0)                     | <b>10.5 (4.7, 16.7)</b>                | 0.4 (-4.6, 5.6)                    | <b>36.1 (11.6, 66.0)</b>   |
|                                |             | 50-59 years                                  | 10.9 (-0.2, 23.2)                            | -2.0 (-3.9, 0.0)                     | 0.3 (-2.3, 3.0)                        | <b>5.0 (2.1, 8.0)</b>              | 6.9 (-1.4, 15.9)           |
|                                |             | 60-69 years                                  | <b>26.2 (8.3, 47.0)</b>                      | <b>-4.2 (-6.5, -1.9)</b>             | 2.0 (-0.3, 4.3)                        | <b>4.3 (2.5, 6.0)</b>              | <b>23.7 (7.3, 42.6)</b>    |
|                                |             | 70-79 years                                  | <b>26.4 (9.3, 46.2)</b>                      | <b>-4.0 (-5.7, -2.4)</b>             | <b>2.2 (1.0, 3.4)</b>                  | <b>5.6 (3.7, 7.6)</b>              | <b>22.0 (6.2, 40.2)</b>    |
|                                |             | ≥ 80 years                                   | <b>29.7 (10.3, 52.5)</b>                     | <b>-5.4 (-7.0, -3.8)</b>             | <b>6.9 (5.3, 8.6)</b>                  | <b>6.6 (5.3, 7.9)</b>              | <b>20.5 (2.6, 41.5)</b>    |
|                                | Other       | < 50 years                                   | <b>8.9 (6.6, 11.2)</b>                       | <b>1.9 (0.8, 3.1)</b>                | <b>2.3 (0.9, 3.7)</b>                  | <b>3.4 (2.5, 4.4)</b>              | 0.9 (-0.9, 2.8)            |
|                                |             | 50-59 years                                  | <b>20.4 (15.5, 25.5)</b>                     | <b>1.1 (0.3, 1.8)</b>                | <b>4.3 (3.2, 5.4)</b>                  | <b>4.7 (3.5, 5.9)</b>              | <b>9.1 (5.4, 13.0)</b>     |
|                                |             | 60-69 years                                  | <b>22.7 (16.8, 29.0)</b>                     | 0.8 (-0.4, 1.9)                      | <b>3.6 (2.3, 4.9)</b>                  | <b>4.5 (3.7, 5.2)</b>              | <b>12.6 (8.1, 17.3)</b>    |
|                                |             | 70-79 years                                  | <b>25.4 (19.8, 31.3)</b>                     | 0.5 (-0.3, 1.2)                      | <b>2.3 (1.4, 3.3)</b>                  | <b>4.2 (2.9, 5.5)</b>              | <b>17.4 (12.4, 22.5)</b>   |
|                                |             | ≥ 80 years                                   | <b>18.7 (12.8, 24.8)</b>                     | -1.1 (-2.3, 0.2)                     | <b>3.5 (2.3, 4.7)</b>                  | <b>4.0 (2.6, 5.4)</b>              | <b>11.5 (5.7, 17.5)</b>    |
| IV                             | Breast      | < 50 years                                   | <b>-2.8 (-4.2, -1.3)</b>                     | -0.3 (-1.7, 1.1)                     | 1.2 (-0.4, 2.8)                        | <b>-1.3 (-2.1, -0.5)</b>           | <b>-2.3 (-3.3, -1.3)</b>   |
|                                |             | 50-59 years                                  | <b>-2.8 (-4.6, -1.0)</b>                     | 0.8 (-0.3, 2.0)                      | 0.8 (-0.7, 2.4)                        | -1.1 (-2.3, 0.0)                   | <b>-3.2 (-4.4, -2.0)</b>   |
|                                |             | 60-69 years                                  | <b>-1.5 (-2.7, -0.3)</b>                     | <b>1.9 (0.4, 3.4)</b>                | 0.1 (-1.4, 1.6)                        | 0.0 (-0.6, 0.7)                    | <b>-3.4 (-4.4, -2.4)</b>   |
|                                |             | 70-79 years                                  | <b>7.0 (3.0, 11.2)</b>                       | <b>2.9 (1.2, 4.5)</b>                | <b>3.3 (0.8, 5.9)</b>                  | 0.6 (-0.7, 1.8)                    | 0.4 (-1.4, 2.2)            |
|                                |             | ≥ 80 years                                   | <b>16.3 (6.6, 26.7)</b>                      | -0.3 (-1.9, 1.3)                     | 2.3 (-0.3, 5.0)                        | <b>7.4 (3.9, 10.9)</b>             | 6.8 (-1.6, 16.0)           |
|                                | Colorectal  | < 50 years                                   | <b>5.1 (1.9, 8.4)</b>                        | <b>6.2 (4.1, 8.4)</b>                | -1.9 (-4.3, 0.6)                       | -2.0 (-3.4, -0.7)                  | <b>3.0 (0.7, 5.3)</b>      |
|                                |             | 50-59 years                                  | <b>5.0 (2.2, 7.8)</b>                        | <b>1.6 (0.2, 3.1)</b>                | -0.7 (-1.7, 0.2)                       | 0.3 (-0.7, 1.3)                    | <b>3.9 (2.0, 5.8)</b>      |
|                                |             | 60-69 years                                  | <b>4.6 (1.0, 8.4)</b>                        | -0.7 (-1.4, 0.1)                     | <b>2.3 (0.8, 3.9)</b>                  | -0.2 (-1.5, 1.1)                   | <b>3.2 (0.6, 5.9)</b>      |
|                                |             | 70-79 years                                  | <b>9.8 (7.0, 12.6)</b>                       | -0.4 (-1.3, 0.5)                     | <b>5.4 (3.6, 7.1)</b>                  | 0.3 (-0.7, 1.4)                    | <b>4.2 (1.5, 6.9)</b>      |
|                                |             | ≥ 80 years                                   | <b>13.8 (7.6, 20.4)</b>                      | -0.2 (-1.7, 1.4)                     | <b>6.7 (2.5, 11.1)</b>                 | <b>5.3 (2.4, 8.2)</b>              | <b>1.6 (0.1, 3.2)</b>      |
|                                | Lung        | < 50 years                                   | <b>14.7 (9.3, 20.4)</b>                      | -4.3 (-8.5, 0.1)                     | <b>5.5 (2.2, 8.9)</b>                  | -2.4 (-3.9, -1.0)                  | <b>17.5 (14.1, 20.9)</b>   |
|                                |             | 50-59 years                                  | <b>8.0 (2.5, 13.8)</b>                       | -1.7 (-3.6, 0.2)                     | -0.5 (-2.8, 2.0)                       | 0.0 (-0.7, 0.7)                    | <b>10.4 (6.0, 15.1)</b>    |
|                                |             | 60-69 years                                  | <b>11.3 (6.9, 15.8)</b>                      | <b>-2.5 (-3.2, -1.7)</b>             | 1.2 (0.0, 2.4)                         | <b>0.7 (0.0, 1.3)</b>              | <b>11.9 (8.3, 15.5)</b>    |
|                                |             | 70-79 years                                  | <b>13.3 (9.9, 16.8)</b>                      | -0.9 (-1.9, 0.1)                     | <b>1.8 (0.4, 3.2)</b>                  | <b>2.1 (1.3, 2.9)</b>              | <b>10.0 (6.4, 13.6)</b>    |
|                                |             | ≥ 80 years                                   | <b>20.2 (7.7, 34.1)</b>                      | -1.1 (-2.4, 0.2)                     | <b>3.3 (1.4, 5.2)</b>                  | <b>4.3 (2.5, 6.2)</b>              | <b>12.8 (1.7, 25.2)</b>    |
|                                | Prostate    | < 50 years                                   | -4.9 (-11.1, 1.8)                            | -4.4 (-9.4, 1.0)                     | <b>6.3 (2.0, 10.9)</b>                 | 0.1 (-12.8, 14.9)                  | -2.8 (-10.3, 5.4)          |
|                                |             | 50-59 years                                  | <b>-4.2 (-5.2, -3.3)</b>                     | -2.0 (-3.9, 0.0)                     | -0.8 (-3.1, 1.6)                       | <b>1.9 (0.1, 3.7)</b>              | <b>-3.3 (-4.5, -2.2)</b>   |
|                                |             | 60-69 years                                  | <b>-3.4 (-4.0, -2.8)</b>                     | <b>-4.2 (-6.5, -1.9)</b>             | <b>2.3 (0.2, 4.5)</b>                  | <b>1.4 (1.0, 1.9)</b>              | <b>-2.7 (-3.2, -2.2)</b>   |
|                                |             | 70-79 years                                  | <b>-3.0 (-3.7, -2.4)</b>                     | <b>-4.0 (-5.7, -2.4)</b>             | <b>1.8 (0.9, 2.8)</b>                  | <b>1.4 (0.7, 2.0)</b>              | <b>-2.1 (-2.9, -1.3)</b>   |
|                                |             | ≥ 80 years                                   | <b>-1.2 (-2.0, -0.4)</b>                     | <b>-5.4 (-7.0, -3.8)</b>             | <b>5.7 (3.9, 7.6)</b>                  | <b>1.2 (0.7, 1.8)</b>              | <b>-2.4 (-3.0, -1.7)</b>   |
|                                | Other       | < 50 years                                   | <b>6.9 (4.6, 9.3)</b>                        | <b>1.9 (0.8, 3.1)</b>                | 0.2 (-1.6, 2.1)                        | 0.1 (-1.0, 1.2)                    | <b>4.6 (3.1, 6.2)</b>      |
|                                |             | 50-59 years                                  | <b>5.8 (4.2, 7.4)</b>                        | <b>1.1 (0.3, 1.8)</b>                | 1.0 (-0.2, 2.1)                        | 0.1 (-1.2, 1.3)                    | <b>3.6 (2.3, 5.0)</b>      |
|                                |             | 60-69 years                                  | <b>6.2 (4.3, 8.1)</b>                        | 0.8 (-0.4, 1.9)                      | <b>1.6 (0.4, 3.0)</b>                  | <b>1.0 (0.3, 1.7)</b>              | <b>2.7 (1.0, 4.4)</b>      |
|                                |             | 70-79 years                                  | <b>10.4 (8.6, 12.3)</b>                      | 0.5 (-0.3, 1.2)                      | <b>3.6 (2.5, 4.6)</b>                  | <b>3.3 (2.4, 4.1)</b>              | <b>2.7 (1.2, 4.3)</b>      |
|                                |             | ≥ 80 years                                   | <b>14.0 (11.3, 16.8)</b>                     | -1.1 (-2.3, 0.2)                     | <b>3.9 (2.6, 5.2)</b>                  | <b>4.4 (2.8, 6.1)</b>              | <b>6.2 (4.2, 8.2)</b>      |

Standardized to pooled BC and SK population for 2013

\*does not change with route of administration

Supplementary Table S3 - stratified models (Saskatchewan)

|                                |             |                          | Change in total<br>expenditure per capita | Change in cancer<br>incidence per capita* | Change in users per<br>incident case | Change in<br>prescriptions per user | Change in cost per<br>prescription |
|--------------------------------|-------------|--------------------------|-------------------------------------------|-------------------------------------------|--------------------------------------|-------------------------------------|------------------------------------|
|                                |             |                          | % (95% CI)                                | % (95% CI)                                | % (95% CI)                           | % (95% CI)                          | % (95% CI)                         |
| Total                          | Breast      |                          | -0.2 (-3.5, 3.1)                          | 0.4 (-0.3, 1.2)                           | <b>2.8 (1.2, 4.5)</b>                | 0.1 (-1.9, 2.1)                     | <b>-3.4 (-5.8, -0.9)</b>           |
|                                | Colorectal  |                          | <b>13.5 (7.6, 19.7)</b>                   | <b>4.4 (3.0, 5.8)</b>                     | -1.0 (-3.4, 1.6)                     | 0.3 (-1.0, 1.7)                     | <b>9.3 (5.7, 13.1)</b>             |
|                                | Lung        |                          | <b>14.4 (10.1, 18.9)</b>                  | 0.3 (-0.7, 1.3)                           | <b>2.2 (0.3, 4.1)</b>                | <b>1.5 (0.4, 2.5)</b>               | <b>10.1 (7.7, 12.7)</b>            |
|                                | Prostate    |                          | <b>4.6 (2.2, 7.1)</b>                     | <b>-4.9 (-7.3, -2.4)</b>                  | <b>3.5 (0.8, 6.3)</b>                | <b>4.4 (2.7, 6.2)</b>               | <b>1.8 (1.2, 2.3)</b>              |
|                                | Other       |                          | <b>13.3 (11, 15.6)</b>                    | 0.2 (-0.8, 1.2)                           | <b>2.6 (1.7, 3.5)</b>                | <b>2.9 (1.9, 3.8)</b>               | <b>7.1 (5.3, 9.0)</b>              |
| Total                          | < 50 years  |                          | <b>8.3 (6.1, 10.6)</b>                    | <b>1.6 (0.5, 2.6)</b>                     | <b>3.3 (2.3, 4.4)</b>                | 1.1 (-0.2, 2.3)                     | <b>2.1 (0.6, 3.7)</b>              |
|                                | 50-59 years |                          | <b>8.9 (5.6, 12.2)</b>                    | -0.7 (-1.9, 0.6)                          | <b>3.6 (1.9, 5.3)</b>                | <b>2.2 (1.5, 2.9)</b>               | <b>3.6 (1.2, 6.1)</b>              |
|                                | 60-69 years |                          | <b>9.7 (7.0, 12.5)</b>                    | <b>-1.0 (-1.6, -0.4)</b>                  | <b>3.6 (2.3, 5.0)</b>                | <b>1.6 (0.7, 2.6)</b>               | <b>5.2 (4.0, 6.5)</b>              |
|                                | 70-79 years |                          | <b>10.8 (9.8, 11.9)</b>                   | <b>1.0 (0.1, 1.9)</b>                     | 0.8 (-0.1, 1.7)                      | <b>1.8 (1.1, 2.4)</b>               | <b>7.0 (6.0, 7.9)</b>              |
|                                | ≥ 80 years  |                          | <b>3.6 (2.0, 5.1)</b>                     | 0.6 (-0.4, 1.7)                           | <b>-2.9 (-4.5, -1.3)</b>             | 0.9 (-0.7, 2.6)                     | <b>5.0 (2.9, 7.2)</b>              |
| <b>Fully stratified models</b> |             |                          |                                           |                                           |                                      |                                     |                                    |
| Oral                           | Breast      | < 50 years               | <b>20.2 (13.9, 26.9)</b>                  | 0.3 (-2.1, 2.8)                           | <b>6.4 (3.2, 9.7)</b>                | <b>1.2 (0.3, 2.1)</b>               | <b>11.2 (7.0, 15.6)</b>            |
|                                |             | 50-59 years              | <b>9.5 (1.3, 18.5)</b>                    | <b>-2.6 (-3.9, -1.2)</b>                  | <b>5.1 (2.4, 7.9)</b>                | <b>2.1 (0.1, 4.1)</b>               | 5.0 (-2.1, 12.5)                   |
|                                |             | 60-69 years              | <b>11.7 (4.2, 19.7)</b>                   | 0.5 (-1.1, 2.2)                           | <b>4.1 (1.4, 6.9)</b>                | 1.8 (-1.3, 5.0)                     | 5.1 (-1.3, 12)                     |
|                                |             | 70-79 years              | <b>11.5 (7.7, 15.4)</b>                   | <b>4.4 (2.8, 6.0)</b>                     | -1.2 (-3.4, 1.0)                     | 2.5 (0.0, 5.0)                      | <b>5.8 (1.3, 10.6)</b>             |
|                                |             | ≥ 80 years               | <b>-3.7 (-7.8, 0.7)</b>                   | 0.2 (-2.4, 2.8)                           | -2.4 (-5.7, 1.1)                     | 2.2 (-0.4, 4.8)                     | <b>-3.4 (-8.7, 2.3)</b>            |
|                                | Colorectal  | < 50 years               | <b>7.9 (3.5, 12.4)</b>                    | <b>7.0 (1.4, 12.8)</b>                    | 7.5 (-1.0, 16.8)                     | <b>7.9 (2.9, 13.2)</b>              | <b>-12.7 (-16.3, -9.0)</b>         |
|                                |             | 50-59 years              | <b>11.4 (7.0, 15.9)</b>                   | <b>4.6 (2.3, 6.9)</b>                     | <b>9.3 (6.7, 11.9)</b>               | <b>7.4 (3.7, 11.2)</b>              | <b>-9.3 (-10.9, -7.8)</b>          |
|                                |             | 60-69 years              | 5.4 (-3.6, 15.2)                          | <b>4.4 (2.2, 6.8)</b>                     | 3.6 (-2.3, 9.8)                      | <b>10.5 (6.8, 14.4)</b>             | <b>-11.2 (-14.7, -7.6)</b>         |
|                                |             | 70-79 years              | 3.1 (-1.6, 8.0)                           | <b>5.4 (3.0, 7.9)</b>                     | -0.6 (-4.8, 3.8)                     | <b>5.9 (2.5, 9.4)</b>               | <b>-6.6 (-7.9, -5.2)</b>           |
|                                |             | ≥ 80 years               | <b>12.6 (2.9, 23.2)</b>                   | <b>2.2 (0.5, 3.9)</b>                     | 1.5 (-6.3, 10.0)                     | <b>8.3 (5.3, 11.5)</b>              | <b>-0.5 (-3.7, 2.9)</b>            |
|                                | Lung        | < 50 years               | <b>41.2 (17.0, 70.4)</b>                  | -0.6 (-6.3, 5.4)                          | 0.5 (-4.4, 5.6)                      | 4.0 (-3.4, 11.9)                    | <b>35.0 (6.6, 70.9)</b>            |
|                                |             | 50-59 years              | <b>27.6 (2.0, 59.5)</b>                   | -2.1 (-5.2, 1.2)                          | <b>9.3 (5.3, 13.4)</b>               | <b>4.0 (1.1, 7.1)</b>               | 16.3 (-4.0, 40.8)                  |
|                                |             | 60-69 years              | 14.4 (-4.0, 36.3)                         | <b>-2.5 (-3.9, -1.1)</b>                  | 2.8 (-0.5, 6.3)                      | -1.5 (-4.4, 1.5)                    | 15.2 (-3.5, 37.6)                  |
|                                |             | 70-79 years              | <b>27.4 (2.3, 58.7)</b>                   | <b>3.9 (2.5, 5.2)</b>                     | <b>4.4 (1.0, 8.0)</b>                | 1.4 (-2.0, 5.0)                     | 18.6 (-1.8, 43.1)                  |
|                                |             | ≥ 80 years               | <b>35.4 (9.2, 67.7)</b>                   | 0.6 (-1.7, 2.9)                           | <b>11 (0.9, 22.1)</b>                | 2.0 (-5.7, 10.3)                    | <b>24.8 (0.9, 54.4)</b>            |
|                                | Prostate    | < 50 years               | <b>-27.6 (-41.7, -10.0)</b>               | 4.8 (-5.2, 15.8)                          | <b>-11.3 (-18.0, -4.0)</b>           | <b>-22 (-26.4, -17.3)</b>           | -3.7 (-21.6, 18.2)                 |
|                                |             | 50-59 years              | <b>56.2 (32.6, 84.1)</b>                  | <b>-4.2 (-7.0, -1.3)</b>                  | 4.0 (-0.6, 8.8)                      | <b>3.8 (0.4, 7.3)</b>               | <b>49.2 (27.5, 74.5)</b>           |
|                                |             | 60-69 years              | <b>47.6 (24.5, 74.9)</b>                  | <b>-4.6 (-7.0, -2.2)</b>                  | <b>6.1 (2.8, 9.6)</b>                | <b>6.1 (1.9, 10.6)</b>              | <b>36.0 (16.0, 59.4)</b>           |
|                                |             | 70-79 years              | <b>36.8 (13.2, 65.3)</b>                  | <b>-7.1 (-10.7, -3.3)</b>                 | <b>6.2 (3.6, 8.8)</b>                | 2.1 (-1.3, 5.7)                     | <b>34.2 (12.0, 60.7)</b>           |
|                                |             | ≥ 80 years               | 1.7 (-11.5, 16.7)                         | <b>-2.7 (-4.2, -1.1)</b>                  | <b>-3.2 (-5.0, -1.4)</b>             | <b>-6.4 (-7.6, -5.2)</b>            | <b>14.8 (0.3, 31.4)</b>            |
| Other                          | < 50 years  | <b>12.1 (8.8, 15.5)</b>  | 1.4 (0.0, 2.8)                            | 1.6 (-0.2, 3.4)                           | <b>3.8 (1.2, 6.5)</b>                | <b>4.7 (1.5, 8.1)</b>               |                                    |
|                                | 50-59 years | <b>13.1 (2.6, 24.7)</b>  | 0.0 (-1.6, 1.6)                           | <b>2.4 (0.1, 4.8)</b>                     | <b>5.0 (2.3, 7.8)</b>                | 6.0 (-2.1, 14.8)                    |                                    |
|                                | 60-69 years | <b>22.2 (19.2, 25.2)</b> | -1.2 (-2.3, -0.1)                         | <b>4.3 (2.6, 6.0)</b>                     | <b>5.2 (2.1, 8.5)</b>                | <b>12.3 (8.4, 16.3)</b>             |                                    |
|                                | 70-79 years | <b>18.7 (15.2, 22.2)</b> | 0.3 (-1.2, 1.9)                           | 0.8 (-0.8, 2.4)                           | 0.2 (-1.6, 2.1)                      | <b>17.1 (14.3, 20.0)</b>            |                                    |
|                                | ≥ 80 years  | <b>20.3 (9.3, 32.5)</b>  | 0.9 (-0.4, 2.2)                           | <b>-4.1 (-6.7, -1.4)</b>                  | <b>4.2 (1.6, 6.9)</b>                | <b>20.4 (9.7, 32.1)</b>             |                                    |
| IV                             | Breast      | < 50 years               | -0.4 (-4.7, 4.2)                          | 0.3 (-2.1, 2.8)                           | 1.5 (-1.3, 4.4)                      | 0.6 (-1.0, 2.3)                     | -2.8 (-6.1, 0.6)                   |
|                                |             | 50-59 years              | <b>-3.9 (-6.6, -1.1)</b>                  | <b>-2.6 (-3.9, -1.2)</b>                  | 0.0 (-1.5, 1.6)                      | 1.1 (-0.2, 2.5)                     | <b>-2.4 (-4.4, -0.4)</b>           |
|                                |             | 60-69 years              | -4.5 (-9.5, 0.7)                          | 0.5 (-1.1, 2.2)                           | -1.3 (-3.7, 1.2)                     | 0.0 (-2.1, 2.1)                     | <b>-3.6 (-6.6, -0.6)</b>           |
|                                |             | 70-79 years              | 1.1 (-5.6, 8.2)                           | <b>4.4 (2.8, 6.0)</b>                     | -0.8 (-6.1, 4.7)                     | -2.1 (-4.7, 0.7)                    | -0.1 (-2.5, 2.4)                   |
|                                |             | ≥ 80 years               | -8.8 (-29.2, 17.6)                        | 0.2 (-2.4, 2.8)                           | 0.2 (-2.5, 3.1)                      | -2.9 (-9.4, 4.0)                    | -6.5 (-23.3, 14.1)                 |
|                                | Colorectal  | < 50 years               | <b>20.6 (11.8, 30.1)</b>                  | <b>7.0 (1.4, 12.8)</b>                    | 1.7 (-4.8, 8.6)                      | <b>3.4 (0.1, 6.8)</b>               | <b>7.8 (4.0, 11.7)</b>             |
|                                |             | 50-59 years              | <b>17.6 (12.7, 22.8)</b>                  | <b>4.6 (2.3, 6.9)</b>                     | 0.6 (-2.1, 3.2)                      | 0.2 (-1.3, 1.8)                     | <b>11.6 (7.9, 15.5)</b>            |
|                                |             | 60-69 years              | <b>12.7 (3.5, 22.8)</b>                   | <b>4.4 (2.2, 6.8)</b>                     | -1.7 (-5.9, 2.8)                     | -0.7 (-2.6, 1.2)                    | <b>10.6 (5.5, 16.0)</b>            |
|                                |             | 70-79 years              | <b>10.9 (5.0, 17.1)</b>                   | <b>5.4 (3.0, 7.9)</b>                     | -4.5 (-9.0, 0.3)                     | -1.2 (-2.7, 0.4)                    | <b>11.5 (8.2, 15.0)</b>            |
|                                |             | ≥ 80 years               | <b>-15.8 (-24.6, -5.8)</b>                | <b>2.2 (0.5, 3.9)</b>                     | <b>-12.6 (-18.1, -6.7)</b>           | -3.5 (-11.8, 5.5)                   | -1.5 (-9.9, 7.6)                   |
|                                | Lung        | < 50 years               | <b>20.8 (10.4, 32.3)</b>                  | -0.6 (-6.3, 5.4)                          | 1 (-3.5, 5.6)                        | 5.6 (-0.1, 11.5)                    | <b>13.9 (5.1, 23.4)</b>            |
|                                |             | 50-59 years              | <b>11.7 (5.9, 17.8)</b>                   | -2.1 (-5.2, 1.2)                          | <b>6.4 (4.1, 8.8)</b>                | 1.7 (-1.2, 4.7)                     | <b>5.0 (0.9, 9.4)</b>              |
|                                |             | 60-69 years              | <b>5.2 (2.2, 8.2)</b>                     | <b>-2.5 (-3.9, -1.1)</b>                  | -0.3 (-2.6, 2.0)                     | 0.1 (-2.3, 2.6)                     | <b>8.0 (4.8, 11.3)</b>             |
|                                |             | 70-79 years              | <b>20.9 (11.7, 30.9)</b>                  | <b>3.9 (2.5, 5.2)</b>                     | <b>4.1 (1.5, 6.9)</b>                | <b>3.2 (1.0, 5.6)</b>               | <b>8.0 (1.9, 14.5)</b>             |
|                                |             | ≥ 80 years               | <b>13.8 (0.7, 28.5)</b>                   | 0.6 (-1.7, 2.9)                           | 3.9 (-2.8, 11.1)                     | 4.1 (-1.1, 9.6)                     | 5.2 (-3.0, 14.1)                   |
|                                | Prostate    | < 50 years               | -11 (-26.4, 7.8)                          | 4.8 (-5.2, 15.8)                          | <b>-14 (-25.9, -0.1)</b>             | <b>-11.7 (-21.0, -1.3)</b>          | <b>11.0 (2.7, 20.0)</b>            |
|                                |             | 50-59 years              | -1.9 (-5.5, 1.8)                          | <b>-4.2 (-7.0, -1.3)</b>                  | 3.1 (-1.2, 7.6)                      | 2.4 (-1.4, 6.3)                     | -2.7 (-5.6, 0.3)                   |
|                                |             | 60-69 years              | <b>4.1 (2.0, 6.2)</b>                     | <b>-4.6 (-7.0, -2.2)</b>                  | <b>7.1 (3.1, 11.3)</b>               | <b>5.5 (4.4, 6.6)</b>               | <b>-3.3 (-4.6, -2.0)</b>           |
|                                |             | 70-79 years              | 0.5 (-2.2, 3.2)                           | <b>-7.1 (-10.7, -3.3)</b>                 | <b>7.9 (4.3, 11.5)</b>               | <b>4.5 (3.0, 6.1)</b>               | <b>-4.3 (-5.9, -2.7)</b>           |
|                                |             | ≥ 80 years               | -0.9 (-2.5, 0.8)                          | <b>-2.7 (-4.2, -1.1)</b>                  | <b>3.7 (1.4, 6.1)</b>                | <b>2.3 (0.7, 3.9)</b>               | <b>-3.9 (-5.1, -2.6)</b>           |
| Other                          | < 50 years  | <b>6.6 (3.1, 10.1)</b>   | 1.4 (0.0, 2.8)                            | 0.6 (-0.7, 1.9)                           | 0.9 (-1.0, 2.9)                      | <b>3.6 (0.9, 6.5)</b>               |                                    |
|                                | 50-59 years | <b>12.9 (9.7, 16.1)</b>  | 0.0 (-1.6, 1.6)                           | <b>4.8 (2.5, 7.2)</b>                     | 1.6 (-0.3, 3.6)                      | <b>5.9 (3.3, 8.5)</b>               |                                    |
|                                | 60-69 years | <b>10.0 (7.7, 12.4)</b>  | -1.2 (-2.3, -0.1)                         | <b>5.5 (3.1, 7.8)</b>                     | <b>2.2 (0.1, 4.3)</b>                | <b>2.2 (1.0, 5.6)</b>               |                                    |
|                                | 70-79 years | <b>13.2 (10.9, 15.5)</b> | 0.3 (-1.2, 1.9)                           | <b>5.5 (3.7, 7.3)</b>                     | 2.0 (-0.2, 4.3)                      | <b>4.6 (2.2, 7.2)</b>               |                                    |
|                                | ≥ 80 years  | <b>7.4 (0.8, 14.5)</b>   | 0.9 (-0.4, 2.2)                           | <b>3.8 (2.6, 5.1)</b>                     | -2.7 (-6.2, 1.0)                     | 5.7 (0.0, 11.8)                     |                                    |

Standardized to pooled BC and SK population for 2013

\*does not change with route of administration
